# Supplementary material
Source: MDPI journal article supplement (https://www.mdpi.com/1424-2818/14/4/236)
Supplement: s1 [file s1]

**Table S2:** Recommended primer sequences used to amplify the *rbcL* and ITS2 barcode regions. A 6N sequence is added between the forward template specific primer and the universal tail to improve clustering on the Illumina MiSeq.

| Primer name            | Universal Tail                            | 6N Sequence | Primer sequence            |
|------------------------|-------------------------------------------|-------------|----------------------------|
| <i>rbcLaf</i><br>[1]   | <b>ACACTCTTCCCTACACGACGCTCTTCCGATCT</b>   | NNNNNN      | ATGTCACCACAAACAGAGACTAAAGC |
| <i>rbcLr506</i><br>[2] | <b>GTGACTGGAGTTCAGACGTGTGCTCTTCCGATCT</b> |             | AGGGGACGACCATACTTGTTC      |
| ITS2F<br>[3]           | <b>ACACTCTTCCCTACACGACGCTCTTCCGATCT</b>   | NNNNNN      | ATGCGATACTTGGTGTGAAT       |
| UniPlantR<br>[4]       | <b>GTGACTGGAGTTCAGACGTGTGCTCTTCCGATCT</b> |             | CCCGHYTGAYYTGRGGTCDC       |

## References

1. Kress, W.J.; Erickson, D.L. A Two-Locus Global DNA Barcode for Land Plants: The Coding *rbcL* Gene Complements the Non-Coding *trnH-psbA* Spacer Region. *PLoS ONE* **2007**, *2*, e508. <https://doi.org/10.1371/journal.pone.0000508>.
2. de Vere, N.; Rich, T.C.G.; Ford, C.R.; Trinder, S.A.; Long, C.; Moore, C.W.; Satterthwaite, D.; Davies, H.; Allainguillaume, J.; Ronca, S.; et al. DNA barcoding the native flowering plants and conifers of wales. *PLoS ONE* **2012**, *7*, e37945. <https://doi.org/10.1371/journal.pone.0037945>.
3. Chiou, S.J.; Yen, J.H.; Fang, C.L.; Chen, H.L.; Lin, T.Y. Authentication of medicinal herbs using PCR-amplified ITS2 with specific primers. *Planta Med.* **2007**, *73*, 1421–1426. <https://doi.org/10.1055/s-2007-990227>.
4. Moorhouse-Gann, R.J.; Dunn, J.C.; De Vere, N.; Goder, M.; Cole, N.; Hipperson, H.; Symondson, W.O.C. New universal ITS2 primers for high-resolution herbivory analyses using DNA metabarcoding in both tropical and temperate zones. *Sci. Rep.* **2018**, *8*, 8542. <https://doi.org/10.1038/s41598-018-26648-2>.
